# Supplementary material
Source: PubMed Central journal article supplement (PMC11247418)
Supplement: NIHMS2004851-supplement-Supplementary_Tabless.pdf [file NIHMS2004851-supplement-Supplementary_Tabless.pdf]

Supplemental Table 1. Sociodemographic characteristics at baseline among young adult college students in Texas.

| <b>Baseline Sociodemographic Characteristics</b><br>(n=4,448) |                                    |                                      |                                                 |                                                              |
|---------------------------------------------------------------|------------------------------------|--------------------------------------|-------------------------------------------------|--------------------------------------------------------------|
|                                                               | <b>Non-use</b><br>(58.5%; n=2,602) | <b>General use</b><br>(17.1%; n=762) | <b>Blunt and Cannabis use</b><br>(15.0%; n=665) | <b>Concurrent and Co-administration use</b><br>(9.4%; n=419) |
| <b>Sex</b>                                                    |                                    |                                      |                                                 |                                                              |
| Male                                                          | 836 (32.5%)                        | 370 (44.0%)                          | 161 (27.5%)                                     | 223 (49.4%)                                                  |
| Female                                                        | 1736 (67.5%)*                      | 469 (55.8%)*                         | 423 (72.3%)*                                    | 228 (50.6%)                                                  |
| <b>Age (years)</b>                                            | 20.3 (2.1)                         | 21.1 (2.7)                           | 20.4 (2.4)                                      | 20.3 (3.4)                                                   |
| <b>Race/Ethnicity</b>                                         |                                    |                                      |                                                 |                                                              |
| White                                                         | 888 (34.5%)*                       | 305 (36.3%)*                         | 206 (35.2%)*                                    | 171 (37.9%)*                                                 |
| Hispanic                                                      | 752 (29.2%)                        | 282 (33.6%)                          | 203 (34.7%)                                     | 146 (32.4%)                                                  |
| African American                                              | 207 (8.0%)                         | 43 (5.1%)                            | 66 (11.3%)                                      | 34 (7.5%)                                                    |
| Asian American                                                | 551 (21.4%)                        | 132 (15.7%)                          | 61 (10.4%)                                      | 68 (15.1%)                                                   |
| Other/Multiracial                                             | 174 (6.8%)                         | 78 (9.3%)                            | 49 (8.4%)                                       | 32 (7.1%)                                                    |

Supplemental Table 2. Sociodemographic characteristics of young adults who transitioned between classes across each transition period

| <b>Transitions from Baseline to One-Year Follow Up</b>   |                                   |                                       |                                                      |                                                                   |
|----------------------------------------------------------|-----------------------------------|---------------------------------------|------------------------------------------------------|-------------------------------------------------------------------|
|                                                          | <b>Non-use<br/>(33.2%; n=148)</b> | <b>General use<br/>(17.3%; n=77)</b>  | <b>Blunt and<br/>Cannabis use<br/>(35.7%; n=159)</b> | <b>Concurrent and<br/>Co-administration use<br/>(7.2%; n=62)</b>  |
| <b>Sex</b>                                               |                                   |                                       |                                                      |                                                                   |
| Male                                                     | 36 (24.3%)*                       | 33 (42.9%)                            | 50 (31.5%)*                                          | 25 (40.3%)                                                        |
| Female                                                   | 112 (75.7%)                       | 44 (57.1%)                            | 109 (68.6%)                                          | 37 (59.7%)                                                        |
| <b>Age (years)</b>                                       | 20.39 (2.12)                      | 19.99 (2.30)                          | 20.25 (2.29)                                         | 20.63 (2.07)                                                      |
| <b>Race/Ethnicity</b>                                    |                                   |                                       |                                                      |                                                                   |
| White                                                    | 41 (27.7%)*                       | 17 (22.1%)*                           | 54 (34.0%)*                                          | 19 (30.7%)*                                                       |
| Hispanic                                                 | 63 (42.6%)                        | 32 (41.6%)                            | 58 (36.5%)                                           | 27 (43.6%)                                                        |
| African American                                         | 7 (4.7%)                          | 5 (6.5%)                              | 18 (11.3%)                                           | 2 (3.2%)                                                          |
| Asian American                                           | 26 (17.6%)                        | 15 (19.5%)                            | 14 (8.8%)                                            | 9 (14.5%)                                                         |
| Other/Multiracial                                        | 11 (7.4%)                         | 8 (10.4%)                             | 15 (9.4%)                                            | 5 (8.1%)                                                          |
| <b>Transitions from One-Year to Three-Year Follow Up</b> |                                   |                                       |                                                      |                                                                   |
|                                                          | <b>Non-use<br/>(31.4%; n=125)</b> | <b>General use<br/>(26.4%; n=105)</b> | <b>Blunt and<br/>Cannabis use<br/>(32.4%; n=129)</b> | <b>Concurrent and<br/>Co-administration use<br/>(9.8%; n=39)</b>  |
| <b>Sex</b>                                               |                                   |                                       |                                                      |                                                                   |
| Male                                                     | 40 (32.0%)*                       | 43 (41.0%)                            | 51 (39.5%)                                           | 13 (33.3%)                                                        |
| Female                                                   | 85 (68.0%)                        | 62 (59.1%)                            | 78 (60.5%)                                           | 26 (66.7%)                                                        |
| <b>Age (years)</b>                                       | 20.26 (2.33)                      | 20.36 (2.10)                          | 20.43 (2.50)                                         | 20.21 (2.53)                                                      |
| <b>Race/Ethnicity</b>                                    |                                   |                                       |                                                      |                                                                   |
| White                                                    | 44 (35.2%)*                       | 41 (39.1%)*                           | 38 (29.5%)*                                          | 9 (23.1%)                                                         |
| Hispanic                                                 | 42 (33.6%)                        | 31 (29.5%)                            | 43 (33.3%)                                           | 16 (41.0%)                                                        |
| African American                                         | 16 (12.8%)                        | 5 (4.8%)                              | 12 (9.3%)                                            | 2 (5.1%)                                                          |
| Asian American                                           | 17 (13.6%)                        | 18 (17.1%)                            | 23 (17.8%)                                           | 7 (18.0%)                                                         |
| Other/Multiracial                                        | 6 (4.8%)                          | 10 (9.5%)                             | 13 (10.1%)                                           | 5 (12.8%)                                                         |
| <b>Transitions from Baseline to Three-Year Follow Up</b> |                                   |                                       |                                                      |                                                                   |
|                                                          | <b>Non-use<br/>(32.8%; n=239)</b> | <b>General use<br/>(22.4%; n=163)</b> | <b>Blunt and<br/>Cannabis use<br/>(33.3%; n=243)</b> | <b>Concurrent and<br/>Co-administration use<br/>(11.5%; n=84)</b> |
| <b>Sex</b>                                               |                                   |                                       |                                                      |                                                                   |
| Male                                                     | 66 (27.6%)*                       | 68 (41.7%)                            | 87 (35.8%)*                                          | 32 (38.1%)                                                        |
| Female                                                   | 173 (72.4%)                       | 95 (58.3%)                            | 156 (64.2%)                                          | 52 (61.9%)                                                        |
| <b>Age (years)</b>                                       | 20.30 (2.17)                      | 20.11 (2.15)                          | 20.35 (2.39)                                         | 20.27 (2.16)                                                      |
| <b>Race/Ethnicity</b>                                    |                                   |                                       |                                                      |                                                                   |
| White                                                    | 73 (30.5%)*                       | 53 (32.5%)*                           | 77 (31.7%)*                                          | 23 (27.4%)*                                                       |

|                   |            |            |            |            |
|-------------------|------------|------------|------------|------------|
| Hispanic          | 94 (39.3%) | 53 (32.5%) | 87 (35.8%) | 35 (41.7%) |
| African American  | 18 (7.5%)  | 10 (6.1%)  | 24 (9.9%)  | 4 (4.7%)   |
| Asian American    | 40 (16.7%) | 31 (19.0%) | 32 (13.2%) | 14 (16.7%) |
| Other/Multiracial | 14 (5.9%)  | 16 (9.8%)  | 23 (9.5%)  | 8 (9.5%)   |

The one-year follow up measurement occasion occurred in the spring of 2017 and the three-year follow up in the spring of 2019.

Transitions are from any other class to the given class in each column.

\*=indicates a  $p < 0.001$ , a statistically significant difference in proportions between males and females or omnibus tests between all racial/ethnic groups within each latent class.
